# Supplementary material for: Network and Data Integration for Biomarker Signature Discovery via Network Smoothed T-Statistics
Source: PLoS One. 2013 Sep 3;8(9):e73074. doi: 10.1371/journal.pone.0073074 (PMC3760887; doi:10.1371/journal.pone.0073074)
Supplement: Table S12 — Final signatures obtained by stSVM in prostate cancer dataset (MSKCC). (XLS) [file pone.0073074.s015.xls]

## Sheet: Sheet1
Genes Entrez IDS	time.choosen
100124696	100
10048	100
10128	100
10165	100
1017	100
1019	100
10197	100
1020	100
1022	100
10294	100
10524	100
10627	100
10632	100
10644	100
10746	100
1080	100
10845	100
10971	100
10980	100
10989	100
11007	100
11140	100
11218	100
11315	100
11331	100
1147	100
1173	100
1191	100
1211	100
1234	100
1280	100
1282	100
1385	100
1386	100
1387	100
1398	100
1399	100
142	100
1432	100
1452	100
1453	100
1454	100
1457	100
1459	100
1460	100
1487	100
1495	100
1499	100
1514	100
156	100
160	100
163	100
1643	100
1739	100
1742	100
1759	100
1822	100
1856	100
192111	100
1956	100
1975	100
2	100
2033	100
2048	100
2050	100
2060	100
2064	100
207	100
2099	100
2100	100
2147	100
2155	100
217	100
2185	100
2241	100
2243	100
226	100
2260	100
2274	100
23043	100
23077	100
23107	100
2316	100
2318	100
2335	100
2353	100
2475	100
25	100
2534	100
25865	100
26121	100
26994	100
27	100
27101	100
27125	100
2770	100
2771	100
2810	100
2908	100
29110	100
293	100
2931	100
2932	100
29927	100
2997	100
29979	100
30008	100
3014	100
3055	100
3065	100
3091	100
3106	100
3146	100
324	100
3265	100
3313	100
335	100
3480	100
351	100
356	100
3643	100
3667	100
367	100
3685	100
3688	100
3689	100
369	100
3690	100
3716	100
3717	100
3725	100
3791	100
3799	100
3815	100
3856	100
387	100
3875	100
3932	100
4035	100
4067	100
408	100
4086	100
4087	100
4088	100
4089	100
409	100
4092	100
4093	100
4140	100
4147	100
4163	100
4188	100
4193	100
4208	100
4214	100
4215	100
4224	100
4296	100
4301	100
4313	100
4318	100
4331	100
4609	100
4628	100
4641	100
4646	100
4659	100
4690	100
4704	100
4719	100
4720	100
4728	100
4738	100
4790	100
4792	100
4804	100
4851	100
4852	100
4942	100
509	100
5111	100
51366	100
51433	100
51474	100
5159	100
5160	100
51619	100
5170	100
51701	100
5245	100
5290	100
5295	100
5300	100
5335	100
5340	100
5347	100
5359	100
54205	100
54460	100
54472	100
5469	100
55037	100
5515	100
55210	100
55291	100
55379	100
5564	100
5565	100
5566	100
5578	100
5579	100
5580	100
5588	100
5590	100
5594	100
5595	100
5599	100
5663	100
5664	100
56893	100
56945	100
56997	100
57154	100
5747	100
57599	100
5764	100
5777	100
57787	100
5781	100
5788	100
58	100
5829	100
5879	100
5894	100
5901	100
5921	100
5925	100
596	100
5970	100
5987	100
6117	100
6185	100
6197	100
6238	100
6279	100
6310	100
6383	100
63931	100
6418	100
6464	100
6472	100
64750	100
64960	100
64963	100
64965	100
6498	100
6500	100
6502	100
65080	100
65125	100
657	100
6597	100
6654	100
6667	100
6714	100
672	100
6721	100
6722	100
6772	100
6774	100
6776	100
6804	100
6844	100
6850	100
6857	100
6885	100
6908	100
6921	100
6929	100
6949	100
695	100
7040	100
7046	100
7057	100
7074	100
7082	100
7088	100
71	100
7132	100
7157	100
718	100
7186	100
7189	100
72	100
7273	100
7276	100
7297	100
7321	100
7322	100
7323	100
7324	100
7329	100
7409	100
7410	100
7415	100
7416	100
7430	100
7465	100
7514	100
7525	100
7529	100
7532	100
7533	100
7534	100
7704	100
7846	100
7874	100
79009	100
7917	100
7978	100
801	100
80232	100
8065	100
81	100
815	100
81570	100
818	100
8202	100
8204	100
821	100
8237	100
8328	100
836	100
83737	100
83755	100
83858	100
841	100
8440	100
8450	100
8451	100
84528	100
8453	100
8454	100
84687	100
84708	100
8517	100
85366	100
8554	100
857	100
8573	100
8576	100
8655	100
867	100
8673	100
868	100
8764	100
8767	100
8773	100
8841	100
8850	100
90	100
902	100
9093	100
9094	100
9131	100
9146	100
91748	100
920	100
93	100
9361	100
9368	100
9463	100
9513	100
9564	100
9641	100
9737	100
9759	100
9802	100
983	100
9869	100
998	100
999	100
1891	99
5906	99
8924	99
10939	98
3937	97
27185	95
7448	94
302	93
2773	92
85440	92
219	91
1508	89
4149	86
440275	86
7471	85
1277	81
4110	67
498	66
10921	62
3676	62
4211	48
3030	36
506	31
5062	21
817	17
10681	14
22907	13
4233	12
291	9
6159	8
5034	7
6347	7
5562	6
598	6
712	5
2776	4
2113	1
5584	1
